# Supplementary material for: A Novel Approach Considering Spatial Heterogeneity in Tuberculosis Prediction of China
Source: Research Square preprint supplement (doi:10.21203/rs.3.rs-8690819/v1), 2026-02-12
Supplement: Supplementary file 1 [file 790afc44171a08e41dc176e2.docx]

**A Novel Approach Considering Spatial Heterogeneity in Tuberculosis Prediction of China**

Xian Zhanga, Xiaohua Nib, Qianqian Zhangb, Xiaowei Zhengb, Nazrullozoda Sulaimonc, Zengyun Hub∗

aSchool of Public Health, Zhengzhou University, Zhengzhou 450001, China

bSchool of Global Health, Chinese Center for Tropical Diseases Research, Shanghai Jiao Tong University School of Medicine, Shanghai 200025, China

cInstitute of Veterinary Medicine of the Tajik Academy of Agricultural Sciences, Dushanbe 734003, Republic of Tajikistan

*****Corresponding author: Zengyun Hu

Email: hzyhjq@sjtu.edu.cn (Zengyun Hu)

**
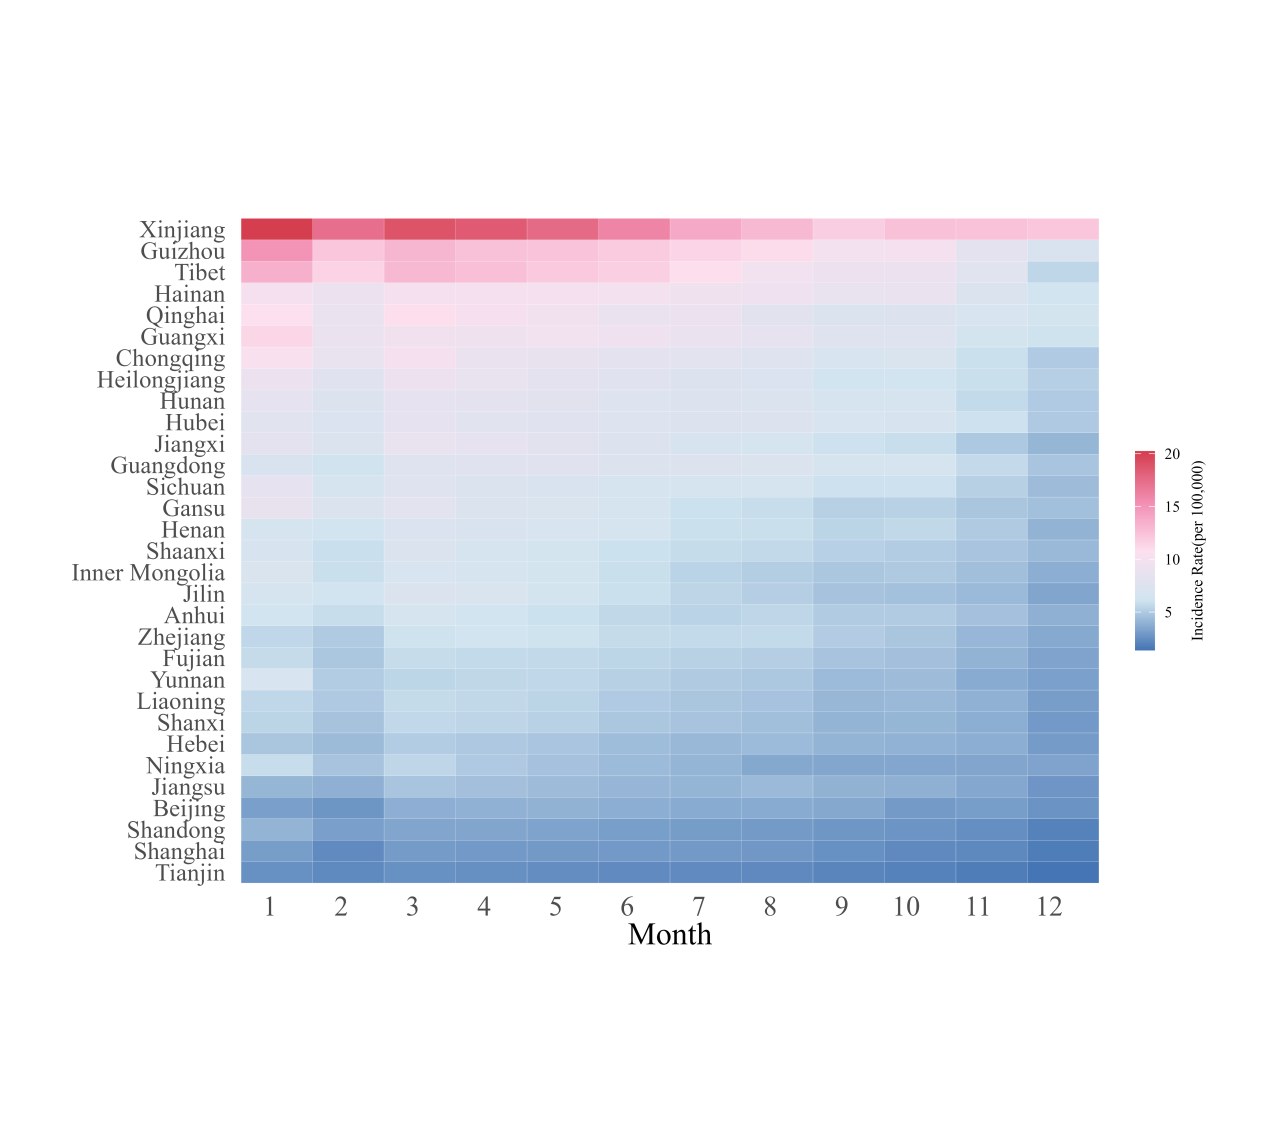
**

**Figure S1.** Spatiotemporal distribution heat map of the monthly average TB incidence in mainland China during 2004-2020


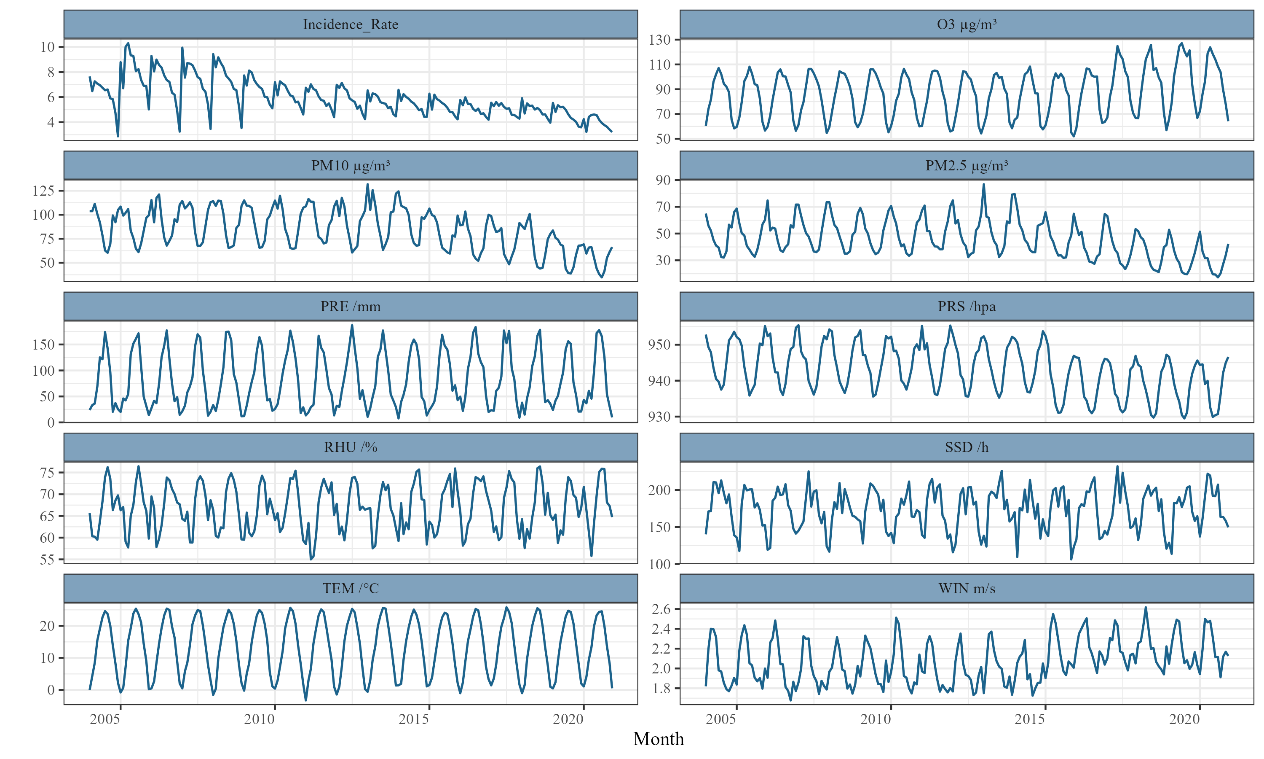


**Figure S2.** Temporal trends of monthly TB incidence and its associated influencing factors in mainland China

| (a) | (b) |
| --- | --- |
| 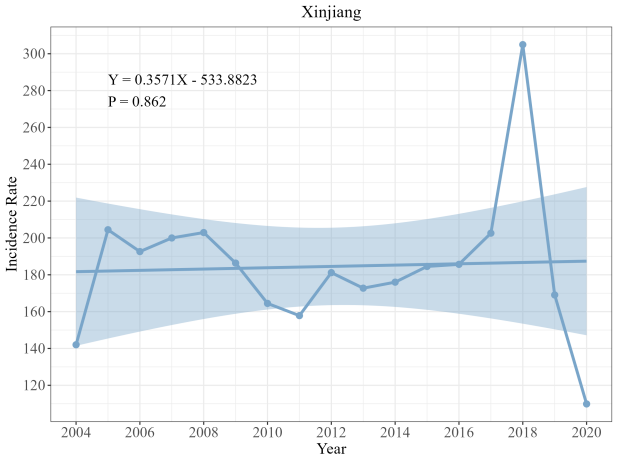 | 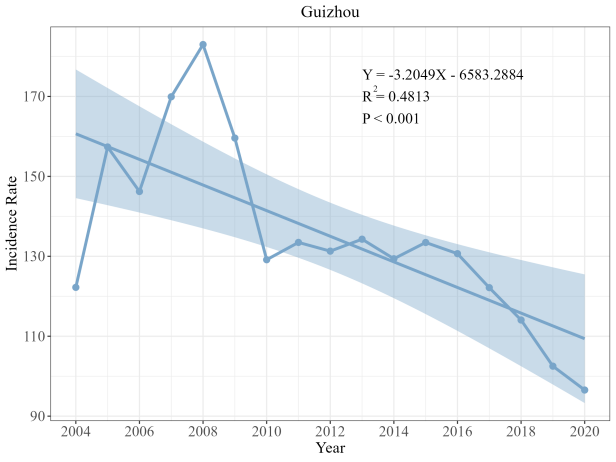 |
| (c) | (d) |
| 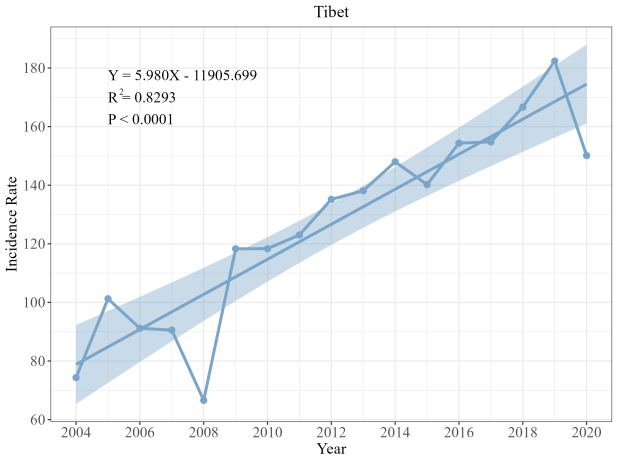 | 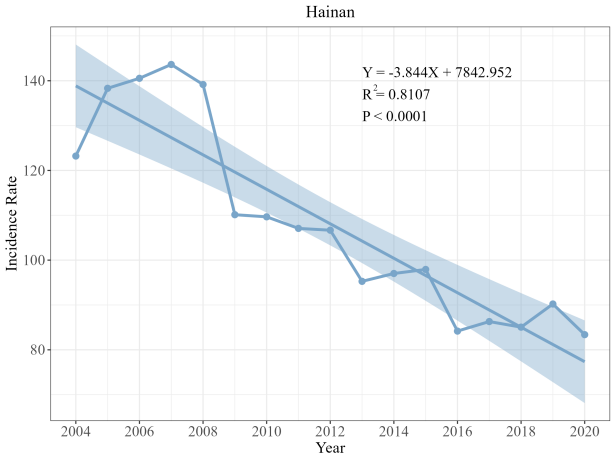 |
| (e) | (f) |
| 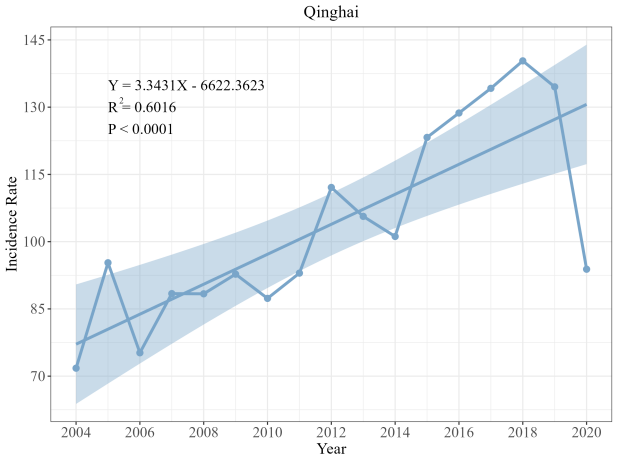 | 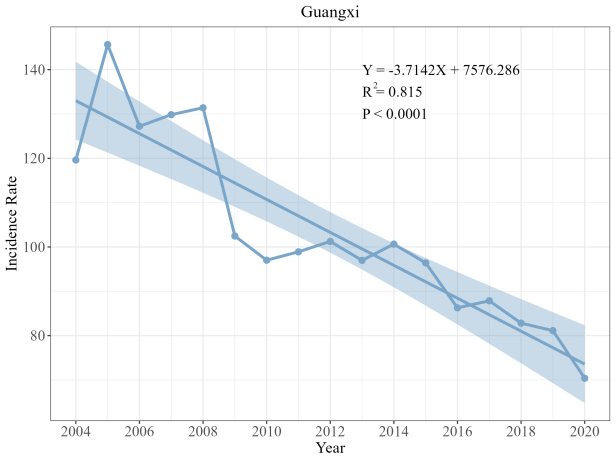 |
| (g) | (h) |
| 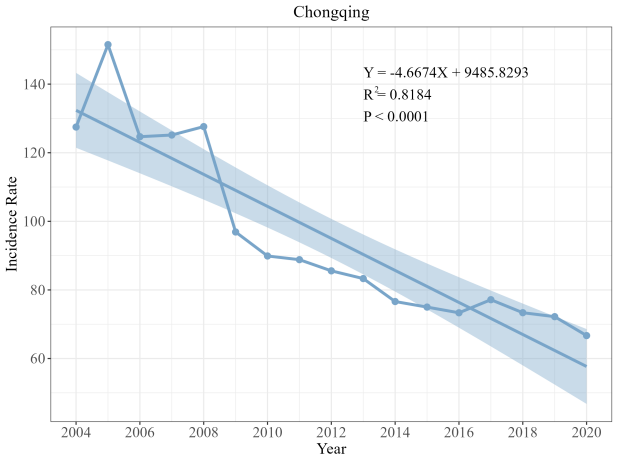 | 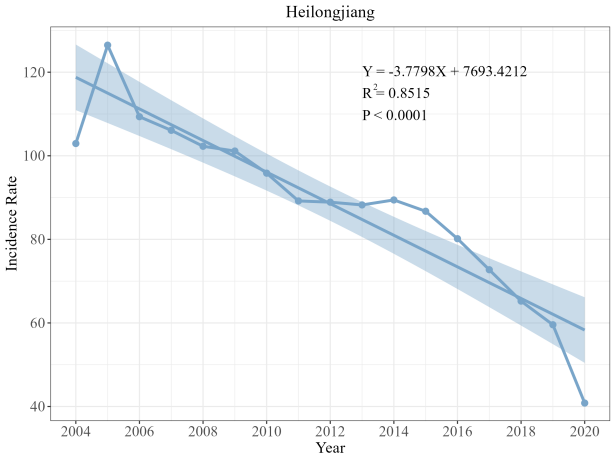 |
| (i) | (j) |
| 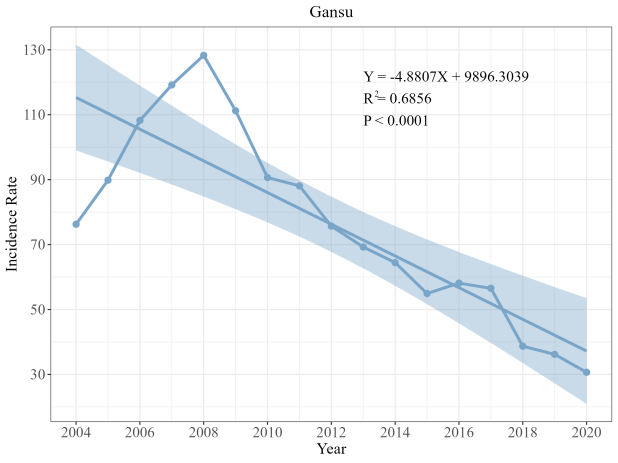 | 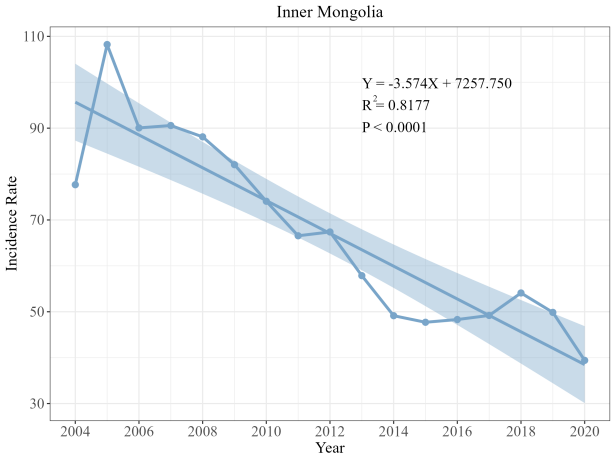 |

**Figure S3.** Linear trends in the annual incidence of TB across ten key provinces in mainland China
